# Supplementary material for: Feasibility and Normal Ranges of Arterial Intima-Media Thickness and Stiffness in 2-Year-Old Children: A Pilot Study
Source: Springer Nature journal article supplement (doi:10.1007/s00246-019-02088-1), 2019-03-16
Supplement: MOESM1 [file 16553770]

**Feasibility and Normal Ranges of Arterial Intima-Media Thickness and Stiffness in 2-year-old Children: A Pilot Study**

Bing Zhao, MD, MSc a; Fay H. Johnston, MBBS, PhD a; Marita Dalton, GradDipEpidemiol a; Kazuaki Negishi, MD, PhD a;

a Menzies Institute for Medical Research, University of Tasmania, Hobart, Australia, 7000

**Journal Name :**Pediatric Cardiology

**Corresponding Author**

Dr Kazuaki Negishi, MD, PhD, FRACP, FACC, FESC, FASE, FAHA, FCSANZ
Menzies Institute for Medical Research, University of Tasmania
17 Liverpool St, Hobart, TAS 7000, Australia
Tel/ +61 36226-7418, Fax/ +61 36226-7704
E-mail: [Kazuaki.Negishi@utas.edu.au](mailto:Kazuaki.Negishi@utas.edu.au)

**Supplementary Materials**

**Tables**

**Table S1 Vascular IMT among study participants (n=42)**

**Table S2 Stiffness of vascular among study participants (n=42)**

**Table S3 Reports on intima-media thickness values on children**

**Table S4 Reports on pulse wave velocity values on children**

**Table S1 Vascular IMT among study participants (n=42)**

| Variable | | n | Mean ± SD | Median | Minimum | Maximum | IQR |
| --- | --- | --- | --- | --- | --- | --- | --- |
| Far wall | Max (mm) | | | | | | |
| Left cIMT | 37 | 0.60 ± 0.05 | 0.60 | 0.51 | 0.71 | 0.09 |
| Right cIMT | 35 | 0.59 ± 0.04 | 0.59 | 0.52 | 0.69 | 0.06 |
| aaIMT | 39 | 0.47 ± 0.07 | 0.48 | 0.32 | 0.63 | 0.08 |
| Min (mm) | | | | | | |
| Left cIMT | 37 | 0.42 ± 0.05 | 0.42 | 0.32 | 0.54 | 0.09 |
| Right cIMT | 35 | 0.42 ± 0.04 | 0.42 | 0.36 | 0.49 | 0.06 |
| aaIMT | 39 | 0.31 ± 0.06 | 0.31 | 0.21 | 0.48 | 0.1 |
| Ave (mm) | | | | | | |
| Left cIMT | 37 | 0.51 ± 0.04 | 0.51 | 0.44 | 0.62 | 0.07 |
| Right cIMT | 35 | 0.51 ± 0.03 | 0.51 | 0.44 | 0.57 | 0.06 |
| aaIMT | 39 | 0.40 ± 0.06 | 0.39 | 0.28 | 0.54 | 0.09 |
| Points | | | | | | |
| Left cIMT | 37 | 244 ± 13b | 247 | 184 | 249 | 1 |
| Right cIMT | 35 | 240 ± 23b | 247 | 157 | 250 | 1 |
| aaIMT | 39 | 185 ± 63b | 190 | 83 | 287 | 122 |
| Near wall | Max (mm) | | | | | | |
| Left cIMT | 37 | 0.58 ± 0.06 | 0.59 | 0.44 | 0.68 | 0.07 |
| Right cIMT | 35 | 0.59 ± 0.05 | 0.59 | 0.47 | 0.70 | 0.04 |
| aaIMT | 39 | 0.48 ± 0.05 | 0.48 | 0.39 | 0.57 | 0.08 |
| Min (mm) | | | | | | |
| Left cIMT | 37 | 0.39 ± 0.05 | 0.39 | 0.28 | 0.55 | 0.07 |
| Right cIMT | 35 | 0.41 ± 0.05 | 0.42 | 0.27 | 0.5 | 0.07 |
| aaIMT | 39 | 0.32 ± 0.05 | 0.31 | 0.21 | 0.42 | 0.07 |
| Ave (mm) | | | | | | |
| Left cIMT | 37 | 0.49 ± 0.05 | 0.48 | 0.39 | 0.6 | 0.07 |
| Right cIMT | 35 | 0.50 ± 0.04 | 0.49 | 0.39 | 0.58 | 0.06 |
| aaIMT | 39 | 0.40 ± 0.04 | 0.40 | 0.32 | 0.50 | 0.07 |
| Points | | | | | | |
| Left cIMT | 37 | 241 ± 26 | 247 | 112 | 248 | 0 |
| Right cIMT | 35 | 240 ± 21 | 247 | 161 | 248 | 0 |
| aaIMT | 39 | 185 ± 66 | 188 | 77 | 269 | 129 |

a Abbreviations: aaIMT, abdominal aorta intima-media thickness; Ave, average; cIMT, carotid intima-media thickness; Max, maximum; Min, minimum.

b The number of data points automatically-detected at far wall cIMT was higher than that in the far wall of the aaIMT, p < 0.001.

**Table S2 Stiffness of vascular among study participants (n=42)**

| Variable | | n | Mean ± SD | Median | Minimum | Maximum | IQR |
| --- | --- | --- | --- | --- | --- | --- | --- |
| Left carotid  artery | Dmax (mm) | 37 | 4.56 ± 0.25 | 4.51 | 4.04 | 5.13 | 0.38 |
| Dmin (mm) | 37 | 3.85 ± 0.27 | 3.84 | 3.27 | 4.46 | 0.27 |
| Strain | 37 | 0.19 ± 0.05 | 0.18 | 0.12 | 0.30 | 0.06 |
| β | 28 | 3.34 ± 1.19 | 3.21 | 0.98 | 5.29 | 1.83 |
| Right carotid artery | Dmax (mm) | 35 | 4.61 ± 0.36 | 4.68 | 4.01 | 5.36 | 0.55 |
| Dmin (mm) | 35 | 3.84 ± 0.31 | 3.88 | 3.27 | 4.51 | 0.50 |
| Strain | 35 | 0.20 ± 0.04 | 0.20 | 0.11 | 0.32 | 0.05 |
| β | 28 | 3.11 ± 0.98 | 3.24 | 0.92 | 5.48 | 1.29 |
| Carotid artery | Dmax (mm) | 37 | 4.58 ± 0.27 | 4.58 | 4.07 | 5.08 | 0.53 |
| Dmin (mm) | 37 | 3.85 ± 0.25 | 3.84 | 3.27 | 4.30 | 0.31 |
| Strain | 37 | 0.19 ± 0.04 | 0.19 | 0.12 | 0.31 | 0.05 |
| β | 28 | 3.23 ± 1.01 | 3.10 | 0.95 | 4.99 | 1.74 |
| Abdominal aorta | Dmax (mm) | 39 | 4.67 ± 0.89 | 4.46 | 3.34 | 6.77 | 1.54 |
| Dmin (mm) | 39 | 4.14 ± 0.73 | 4.02 | 2.87 | 6.19 | 0.98 |
| Strain | 39 | 0.13 ± 0.06 | 0.11 | 0.03 | 0.26 | 0.08 |
| β | 28 | 6.34 ± 4.27 | 4.78 | 1.45 | 19.34 | 3.28 |

a Abbreviations: Dmax, end-systolic diameter; Dmin, end-diastolic diameter; β, artery stiffness index.

**Table S3 Reports on intima-media thickness values on children**

| Author year(Ref) | Site | Measurement | Age | No. | Sex | cIMT Value | | aaIMT Value | |
| --- | --- | --- | --- | --- | --- | --- | --- | --- | --- |
| Male | Female | Male | Female |
| Sass  1998[13] | France | Not reported but probably automated  (≥50 measurements) | 10-24y | 193 | Male (44%) | 0.50 | 0.48 | - | - |
| 10-12y | 46 | Male (50%) | 0.49 | 0.48 | - | - |
| Jourdan 2005[23] | Germany Poland | Manually with the calipers | 10-20y | 247 | Male (49%) | 0.38 - 0.40 | | - | - |
| 10-13.9y | 102 | Male (40%) | 0.38 | | - | - |
| Bohm 2009[14] | Germany | Semi-automated detection  software (Sigma Scan Pro 5.0, 11measurements*3) | 6-17y | 267 | Male (46%) | Median 0.51  IQR 0.48-0.56 | | - | - |
| 8/9y | 102 | Male (39%) | Median 0.50 | Median 0.49 | - | - |
| Dawson 2009[20] | US | Automated reading program | 11-34y | 635 | Male (49%) | 0.50 | 0.49 | 0.63 | 0.61 |
| 11-17y | 228 | Male (56%) | 0.48 | 0.46 | 0.57 | 0.55 |
| Doyon 2013[7] | Turkey Germany  Sweden  Poland | Manual method: 5 average OR Semi-automatical software  (Syngo US Workplace; Siemens) | 6-18y | 1051 | Male (47%) | 0.370 - 0.408 | 0.366 - 0.391 | - | - |
| 6-8.99y | 181 | Male (52%) | 0.370 - 0.375 | 0.366 - 0.374 | - | - |
| Ried-Larsen 2014[15] | Denmark | Automated software (Vascular Research Tools5) | 15.6y | 254 | Male (42%) | 0.570 | 0.548 | - | - |
| Baroncini 2016[24] | Brazil | Manual calipers | 1-15y | 280 | Male (63%) | 0.43b  6-10y: 0.42  11-15y:0.45 | 0.42b  6-10y:0.41  11-15y:0.45 | - | - |
| 1-5y | 93 | Male (61%) | 0.43 | 0.42 | - | - |
| Breton 2016[21] | US | Automated detection software (Prosound, USC, 70 to 100 measurements) | 11y | 392 | Male (46%) | Right 0.565  Left 0.561 | | - | - |
| Our paper | Australia | Automatic detection procedure  ( GE Healthcare) | 2y | 39 | Male (38%) | 0.501 | 0.516 | 0.405 | 0.391 |

a IMT values are mean (mm) unless stated otherwise.

b Whole population cIMT 0.43mm, 1-5y: 0.42mm, 6-10y: 0.42mm, 11-15y: 0.45mm.

c Abbreviation: aaIMT, Abdominal Aorta Intima-Media Thickness; cIMT, Carotid Intima-Media Thickness.

**Table S4 Reports on pulse wave velocity values on children**

| Author year(Ref) | site | Measurement | Age | No. | Sex | PWV Value | |
| --- | --- | --- | --- | --- | --- | --- | --- |
| Male | Female |
| Reusz 2010[26] | Hungary  Italy  Algeria | Applanation tonometry  (PulsePen device, DiaTecne s.r.l.) | 6-20y | 1008 | Male (49%) | Median 4.35-5.17 | Median 4.34-5.51 |
| 6.55-9.91y | 121 | Male (46%) | Median 4.396 | Median 4.496 |
| Hidvegi 2012[30] | Hungary | Oscillometry (Arteriograph, TensiMed Ltd, Budapest, Hungary) | 3-18y | 3374 | Male (53%) | 5.5-6.5 | 5.6-6.4 |
| 3y | 79 | Male (56%) | 5.5 | 5.6 |
| Elmenhorst 2015[29] | Germany | Oscillometry (Mobil-O-Graph, I.E.M., Stolberg,Germany) | 8-22y | 1445 | Male (51%) | 4.70b | 4.64b |
| 8y | 48 | Male (60%) | 4.27 | 4.29 |
| Thurn 2015[12] | Turkey  Germany | Oscillometry (Vicorder system, Skidmore Medical, Bristol, UK) | 6-18y | 1003 | Male (46%) | 4.16-5.64 | 4.15-5.36 |
| 6-8.99y | 204 | Male (56%) | 4.3 | 4.3 |
| Mora-Urda 2017[27] | Spain | Applanation tonometry (SphygmoCor, AtCor Medical, Australia) | 8-11y | 350 | Male (52%) | 5.00  No CVRF 4.98  CVRF 5.08 | 5.02  No CVRF 4.95  CVRF 5.30 |
| 8y | 69 | Male (46%) | 4.79 | 4.82 |
| Our paper | Australia | Applanation tonometry (SphygmoCor, AtCor Medical, Australia) | 2y | 25 | Male (44%) | 3.98 | 4.28 |

a PWV values are mean (m/s) unless stated otherwise.

b Whole population PWV 4.67m/s

c Abbreviation: CVRF, Cardiovascular Risk Factor; PWV, Pulse Wave Velocity.
